# Supplementary material
Source: Research Square preprint supplement (doi:10.21203/rs.3.rs-9461574/v1)
Supplement: Supplementary file 1 [file 3182938ba0de8737e7f0649f.docx]

**Online Resource 1 Representative image of Pd3D spheroids captured at the end of culture (day 7).**

**Online Resource 2 Representative images of SSTR2 immunocytochemistry and corresponding digital analysis markup.**


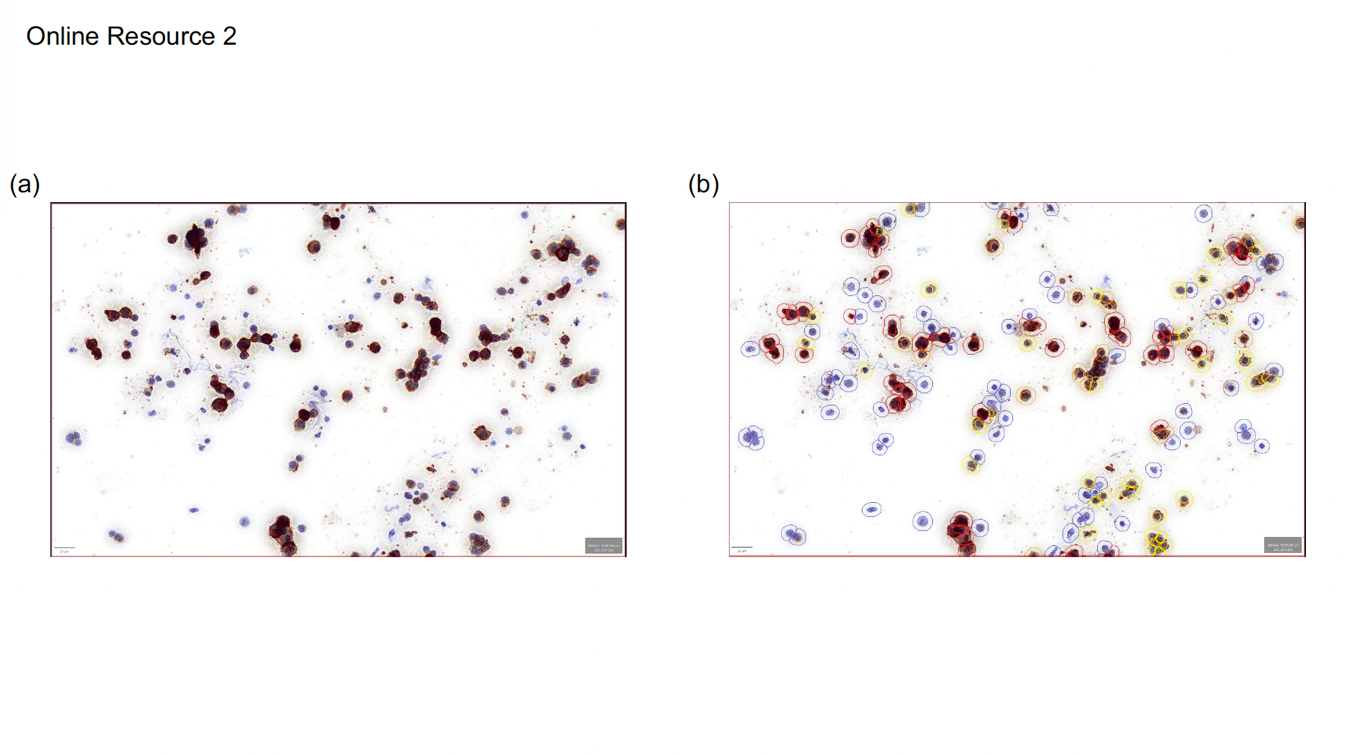
 a. Original immunocytochemical staining of an LBC specimen derived from Pd3D spheroids.

b. Digital analysis markup of the same field. Cells are detected and color-coded based on DAB staining intensity (blue: negative, yellow: 1+, orange: 2+, and red: 3+) for automated H-score calculation.

**Online Resource 3 The viability of control cultures over the experimental period.**

**
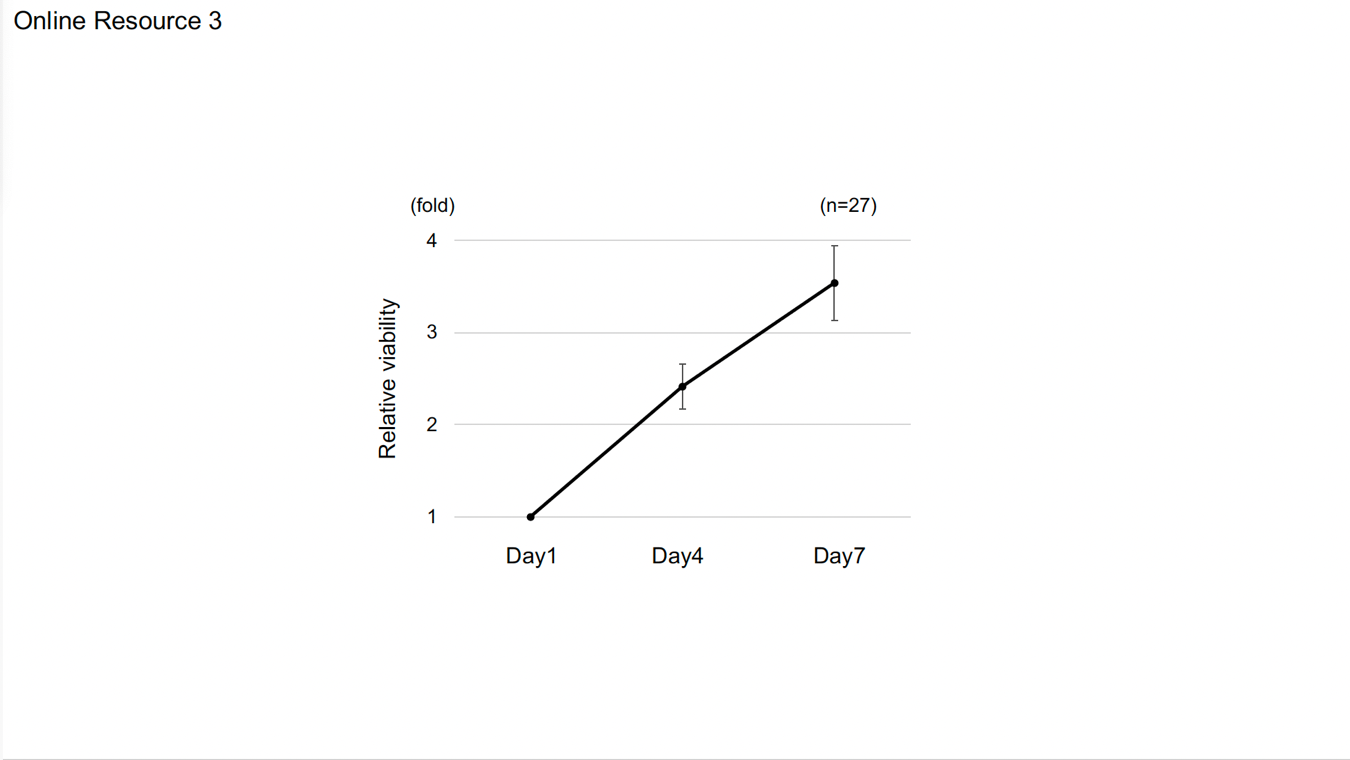
**Cell viability of control cultures was tracked from baseline to the experimental endpoint. All 27 samples maintained robust viability throughout the culture duration. Data are presented as mean ± SE.
