# Supplementary material
Source: Research Square preprint supplement (doi:10.21203/rs.3.rs-9461574/v1)
Supplement: Supplementary file 2 [file b39a71bb599ce4ba1e66357c.docx]

**Table 2 Comparative Analysis of Established Predictors Between *Ex Vivo* Responders and Nonresponders for (a) Octreotide, (b) Cabergoline, and (c) Pasireotide**

**(a) Octreotide**

|  |  | responder | (n) | | nonresponder | | (n) | | *p* value | |
| --- | --- | --- | --- | --- | --- | --- | --- | --- | --- | --- |
| Total number | (%) | 9 (33%) |  | 18 (67%) | |  | |  | |
| Baseline characteristics |  |  |  |  | |  | |  | |
| Age at the time of surgery | (years) | 46 [40,52] | 9 | 48 [32,59] | | 18 | | 0.64 | |
| Sex | (female, %) | 4 (44%) | 9 | 9 (50%) | | 18 | | >0.99 | |
| Basal GH | (ng/mL) | 14 [4.0,29] | 9 | 15 [7.1,40] | | 18 | | 0.75 | |
| IGF-1 SDS |  | +6.1 [+5.6, +6.4] | 9 | +7.0 [+5.3,+7.4] | | 18 | | 0.95 | |
| Dynamic endocrinological test |  |  |  |  | |  | |  | |
| Octreotide suppression test, positive | (cases, %) | 4 (80%) | 5 | 11 (78%) | | 14 | | 0.53 | |
| Octreotide suppression test, suppression rate | (%) | 90.8 [80.8,94.4] | 5 | 82.6 [53.9,89] | | 14 | | 0.16 | |
| Octreotide suppression test, nadir time | (hours) | 4 [4,6] | 5 | 4 [2,4] | | 14 | | 0.3 | |
| Pituitary MRI findings |  |  |  |  | |  | |  | |
| Macroadenoma >10mm | (cases, %) | 8 (88%) | 9 | 18 (100%) | | 18 | | 0.33 | |
| Maximum tumor diameter | (mm) | 13 [13,27] | 9 | 21 [17,27] | | 18 | | 0.16 | |
| Knosp grade, invasion | (cases, %) | 3 (33%) | 9 | 4 (22%) | | 18 | | 0.65 | |
| Knosp grade [0/1/2/3/4] | (cases) | [4/1/1/1/2] | 9 | [1/10/3/3/1] | | 18 | | 0.59 | |
| MRI T2WI hypointensity | (cases, %) | 8 (88%) | 9 | 8 (44%) | | 18 | | 0.04 | |
| Histological findings |  |  |  |  | |  | |  | |
| Granulated pattern, densely | (cases, %) | 6 (66%) | 9 | 11 (61%) | | 18 | | >0.99 | |
| SSTR2 [0/1/2/3] | (cases) | [0/0/2/7] | 9 | [1/1/6/10] | | 18 | | 0.22 | |
| SSTR5 [0/1/2/3] | (cases) | [0/0/8/1] | 9 | [4/4/7/3] | | 18 | | 0.11 | |

**(b) Cabergoline**

|  |  | responder | (n) | nonresponder | (n) | *p* value |
| --- | --- | --- | --- | --- | --- | --- |
| Total number | (%) | 9 (33%) |  | 18 (67%) |  |  |
| Baseline characteristics |  |  |  |  |  |  |
| Age at the time of surgery | (years) | 43 [30,52] | 9 | 49 [40,59] | 18 | 0.17 |
| Sex | (female, %) | 5 (55%) | 9 | 8 (44%) | 18 | 0.69 |
| Basal GH | (ng/mL) | 12 [10,14] | 9 | 24 [5.0,40] | 18 | 0.44 |
| IGF-1 SDS |  | +6.0 [+5.6,+6.4] | 9 | +7.1 [+4.9,+7.7] | 18 | 0.62 |
| PRL | (ng/mL) | 13 [9.0, 24] | 8 | 10 [7.4,15] | 17 | 0.48 |
| Dynamic endocrinological test |  |  |  |  |  |  |
| Bromocriptine suppression test, positive | (cases, %) | 7 (100%) | 7 | 5 (45%) | 11 | 0.03 |
| Bromocriptine suppression test, suppression rate | (%) | 86.0 [69.6,89.8] | 7 | 39.7 [20.6,73.2] | 11 | 0.06 |
| Bromocriptine suppression test, nadir time | (hours) | 6 [5,6] | 7 | 6 [3,6] | 11 | 0.46 |
| Pituitary MRI findings |  |  |  |  |  |  |
| Macroadenoma >10mm | (cases, %) | 8 (88%) | 9 | 18 (100%) | 18 | 0.33 |
| Maximum tumor diameter | (mm) | 19.5 [13.5,23.8] | 9 | 20.4 [16.3,27.9] | 18 | 0.73 |
| Knosp grade, invasion | (cases, %) | 2 (22%) | 9 | 5 (27%) | 18 | >0.99 |
| Knosp grade [0/1/2/3/4] | (cases) | [3/2/2/0/2] | 9 | [2/9/2/4/1] | 18 | 0.74 |
| MRI T2WI hypointensity | (cases, %) | 7 (77%) | 9 | 9 (50%) | 18 | 0.23 |
| Histological findings |  |  |  |  |  |  |
| Granulated pattern, densely | (cases, %) | 5 (55%) | 9 | 12 (66%) | 18 | 0.68 |
| SSTR2 [0/1/2/3] | (cases) | [0/1/1/7] | 9 | [1/0/7/10] | 18 | 0.34 |
| SSTR5 [0/1/2/3] | (cases) | [0/0/7/2] | 9 | [4/4/8/2] | 18 | 0.03 |

**(c) Pasireotide**

|  |  | responder | (n) | nonresponder | (n) | *p* value |
| --- | --- | --- | --- | --- | --- | --- |
| Total number | (%) | 11 (40%) |  | 16 (59%) |  |  |
| Baseline characteristics |  |  |  |  |  |  |
| Age at the time of surgery | (years) | 46.0 [30.0,51.0] | 11 | 49.5 [42.2,60.5] | 16 | 0.13 |
| Sex | (female, %) | 6 (54%) | 11 | 7 (43%) | 16 | 0.70 |
| Basal GH | (ng/mL) | 13.1 [9.03,39.0] | 11 | 15.4 [4.26,32.33] | 16 | 0.53 |
| IGF-1 SDS |  | +6.2 [+5.5,+7.9] | 11 | +6.5 [+5.3,+7.4] | 16 | 0.94 |
| Pituitary MRI findings |  |  |  |  |  |  |
| Macroadenoma >10mm | (cases, %) | 11 (100%) | 11 | 15 (93%) | 16 | >0.99 |
| Maximum tumor diameter | (mm) | 18.1 [13.9,23.0] | 11 | 21.0 [16.4,30.6] | 16 | 0.41 |
| Knosp grade, invasion | (cases, %) | 2 (18%) | 11 | 5 (31%) | 16 | 0.66 |
| Knosp grade [0/1/2/3/4] | (cases) | [3/5/1/1/1] | 11 | [2/6/3/3/2] | 16 | 0.23 |
| MRI T2WI hypointensity | (cases, %) | 7 (63%) | 11 | 9 (56%) | 16 | >0.99 |
| Histological findings |  |  |  |  |  |  |
| Granulated pattern, sparsely | (cases, %) | 7 (64%) | 11 | 3 (19%) | 16 | 0.04 |
| SSTR2 [0/1/2/3] | (cases) | [0/0/3/8] | 11 | [1/1/5/9] | 16 | 0.31 |
| SSTR5 [0/1/2/3] | (cases) | [1/2/6/2] | 11 | [3/2/9/2] | 16 | 0.64 |

Data are presented as numbers (%) or medians [25th–75th percentiles]. Comparisons between groups were performed using the Mann-Whitney U test for continuous and ordinal variables and Fisher’s exact test for categorical variables.

Abbreviations: GH, growth hormone; IGF-1, insulin-like growth factor-1; SDS, standard deviation score; MRI, magnetic resonance imaging; T2WI, SSTR, somatostatin receptor.
